# Supplementary material for: CD83 expression is essential for Treg cell differentiation and stability
Source: JCI journal article supplement (doi:10.1172/jci.insight.99712), 2018-06-06
Supplement: sd1 [file 1]

S1A.1

CD4<sup>+</sup> T cells

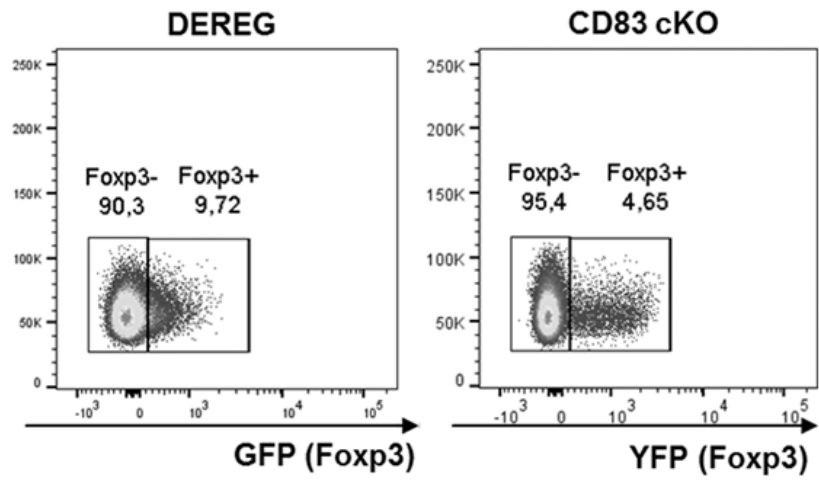

S1A.2

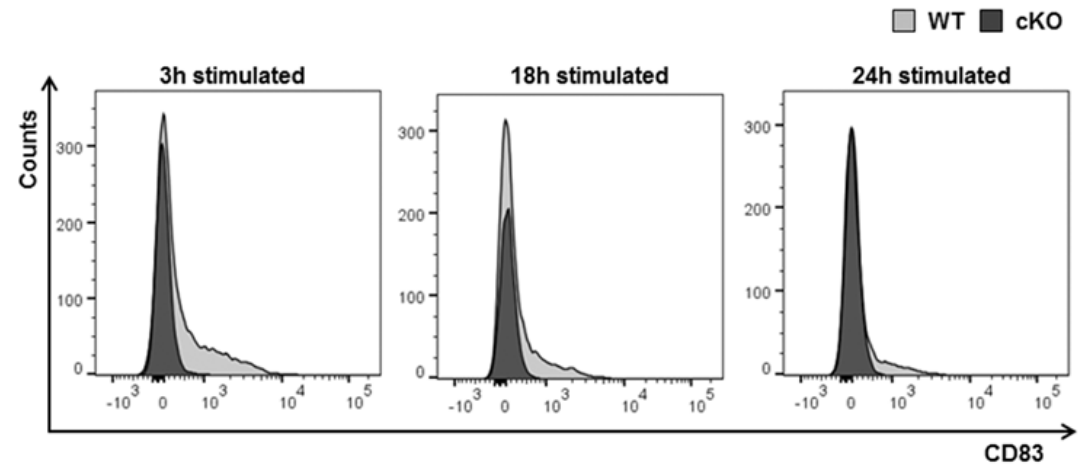

## S1B.1

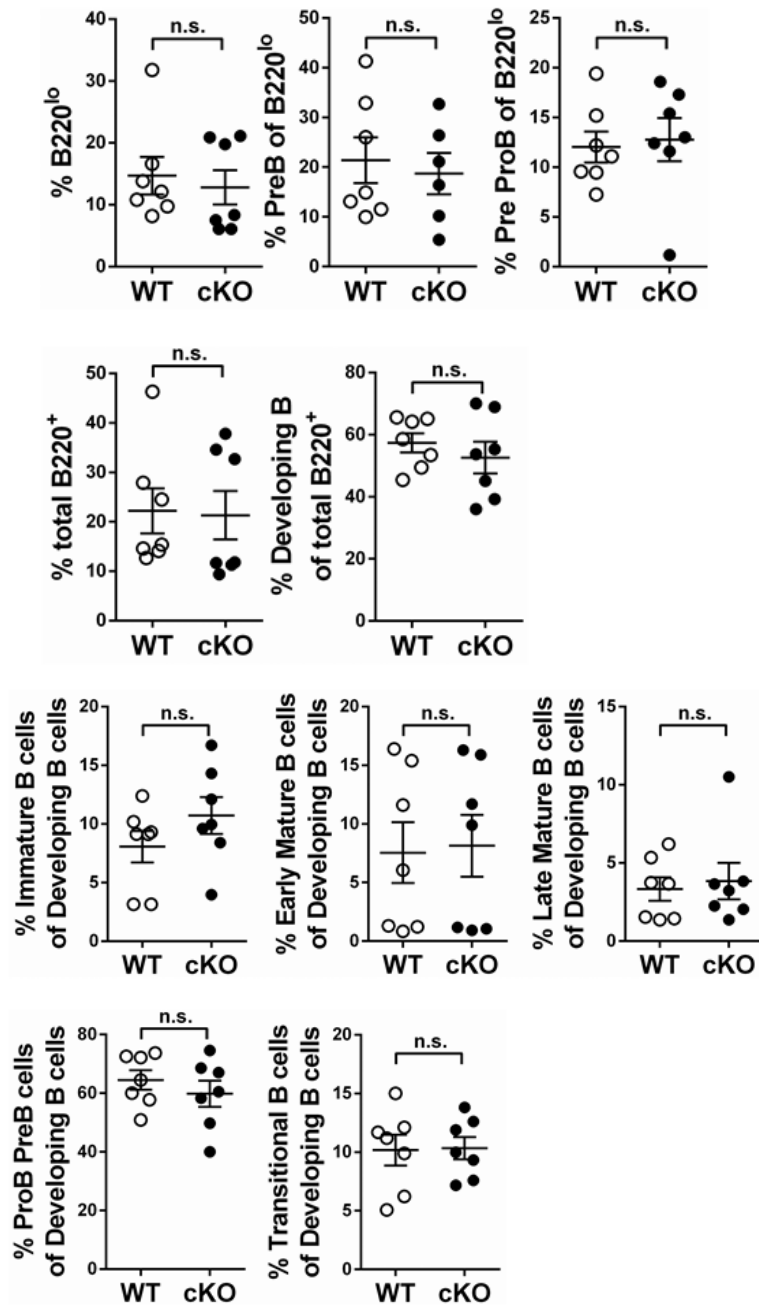

S1B.2

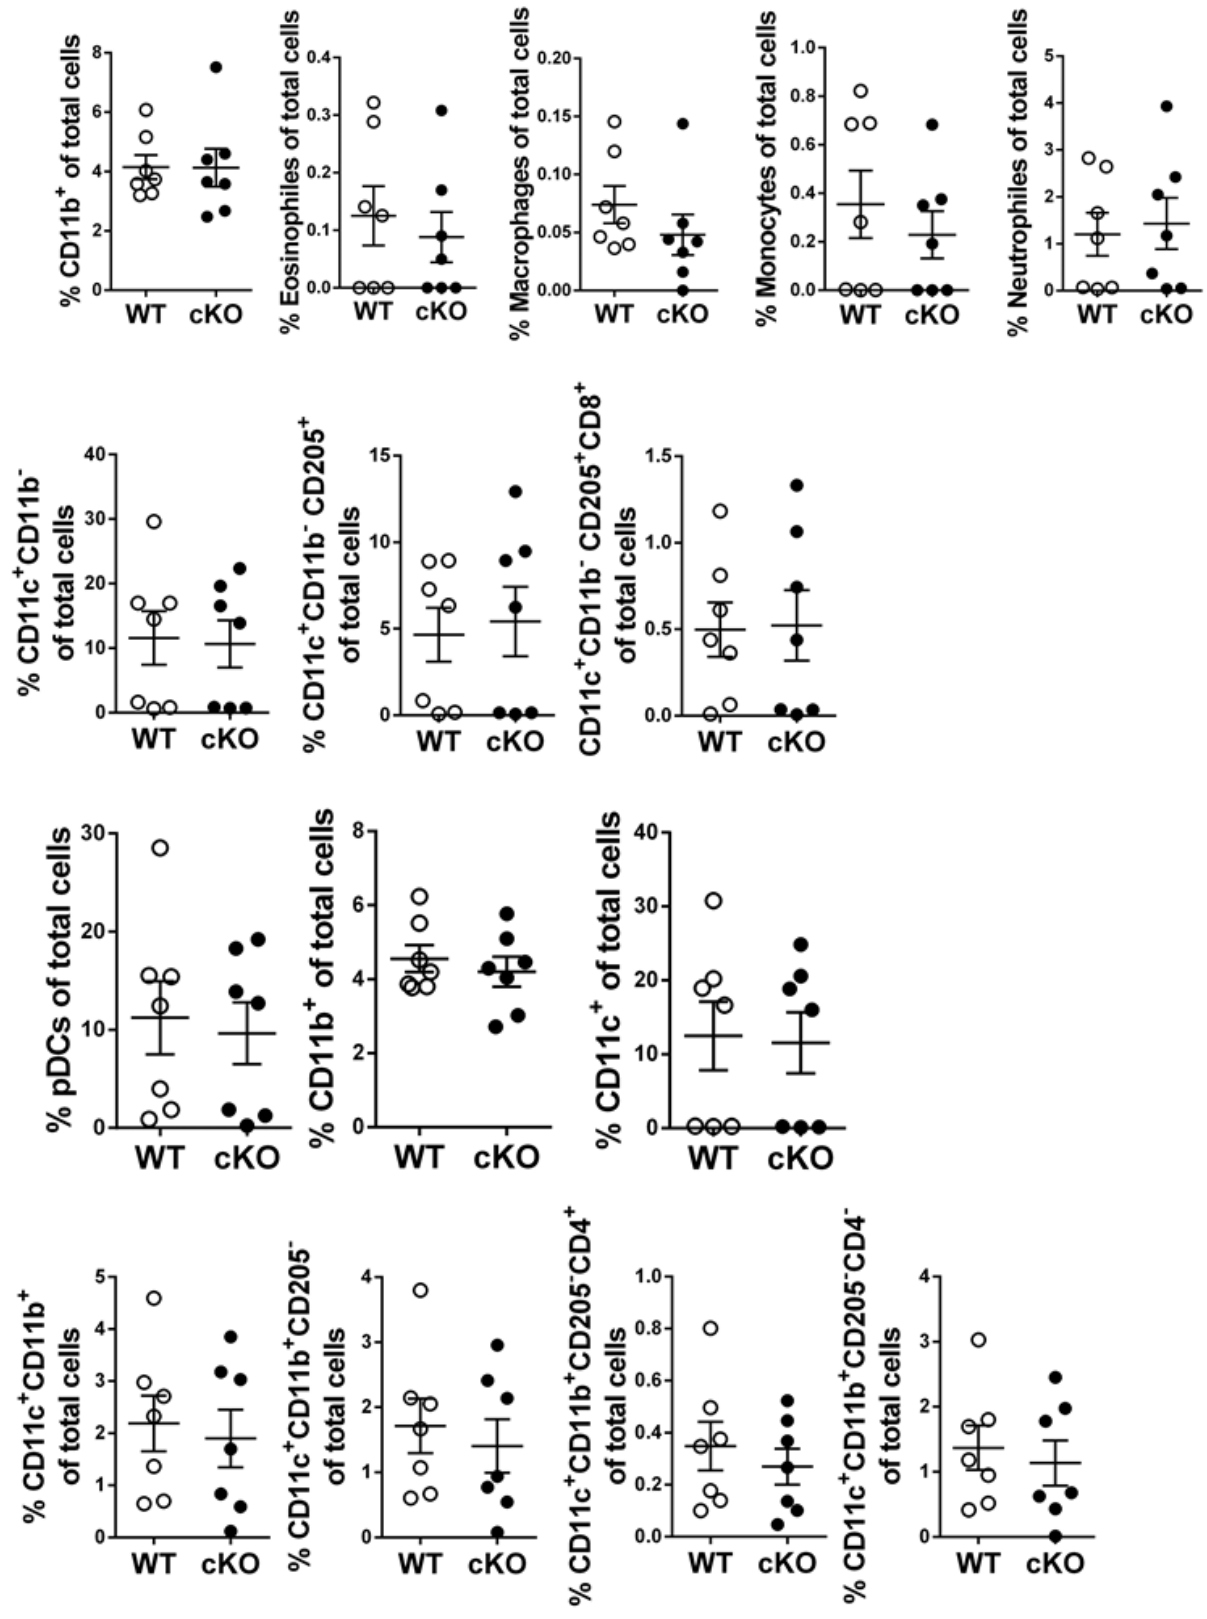

S1B.3

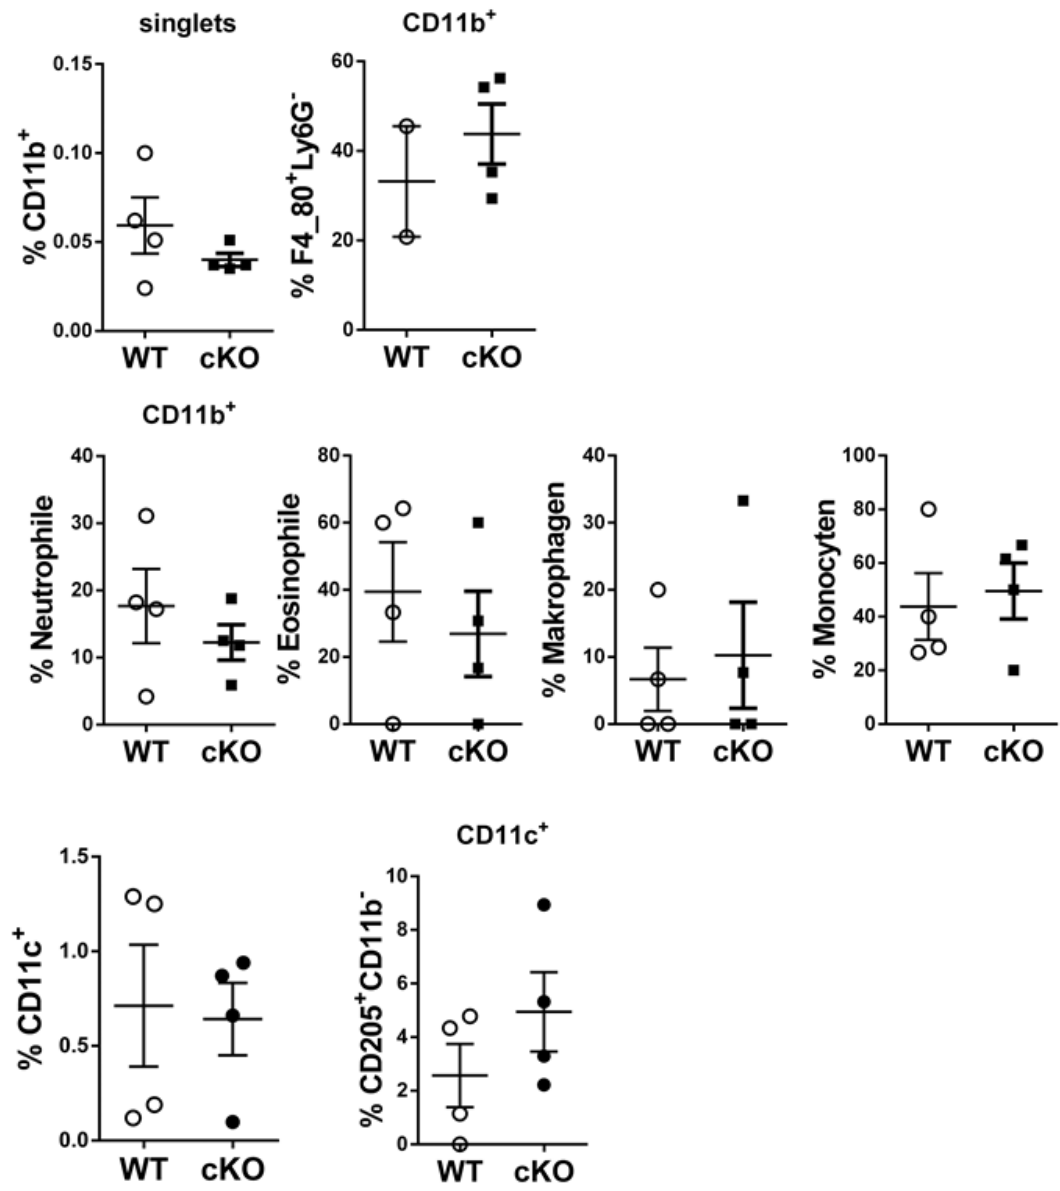

## S1B.4

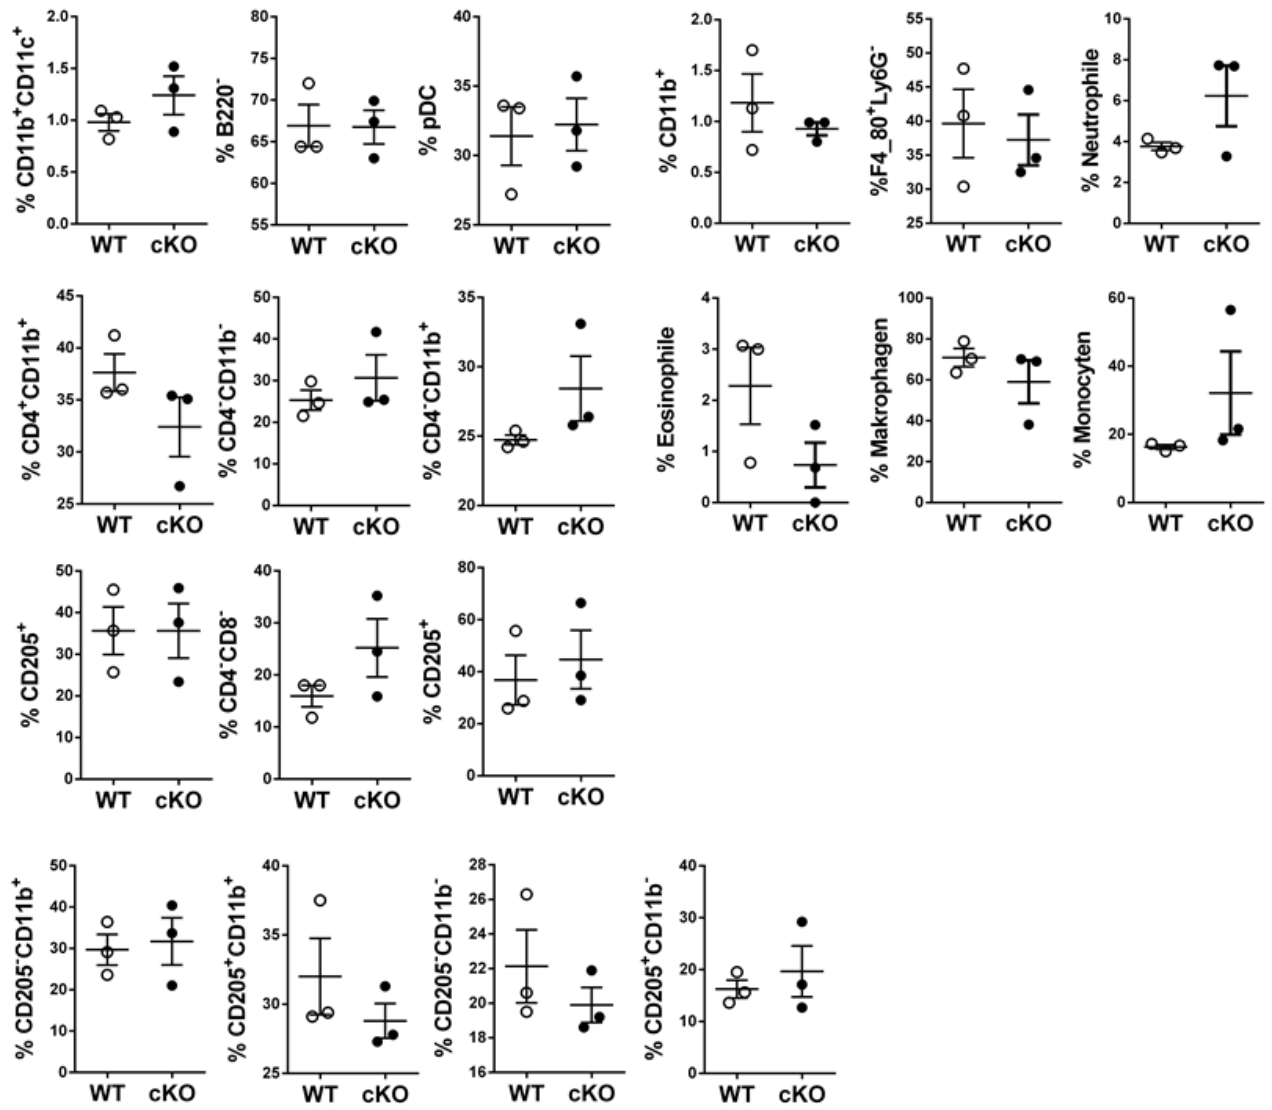

S1C

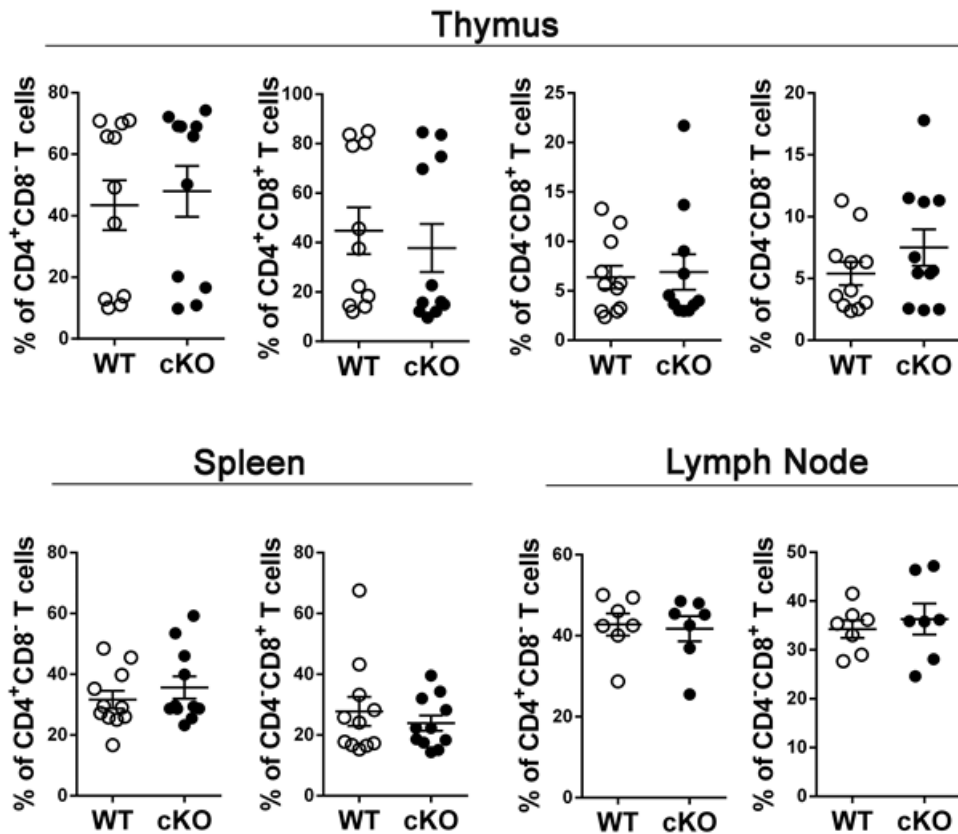

**Supplementary Figure 1. CD83cKO mice showed normal distribution of immune cells**

(A.1) Identification of Foxp3<sup>+</sup> Treg cells using GFP fluorescence in control (DEREG) animals and YFP fluorescence cKO mice (CD83cKO) (A.2) CD83 expression in stimulated splenic CD4<sup>+</sup> T cells (B.1) Flow cytometry analyses of bone marrow, staining for B cells (B.2) spleen, staining for dendritic cells, monocytes, eosinophils, neutrophils and macrophages (B.3) thymus and (B.4) lymph node cells staining for dendritic cell and monocyte numbers. (C) FACS analysis regarding the CD4<sup>+</sup>:CD8<sup>+</sup> T cell ratio in spleen, thymus and peripheral lymph nodes.

S2

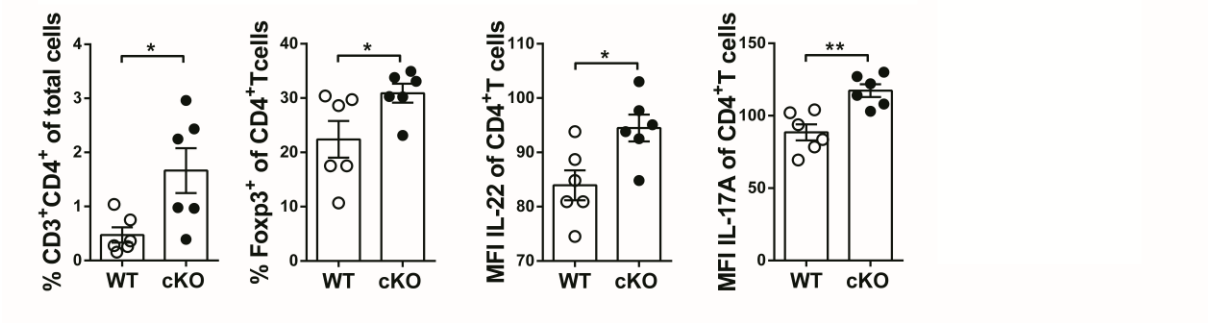

**Supplementary Figure 2. The migration to the CNS is not impaired in cKO Tregs.**

Flow cytometry analyses of brain, staining for CD4<sup>+</sup> T cells, Foxp3 T cells and the cytokines IL-22 and IL-17A.

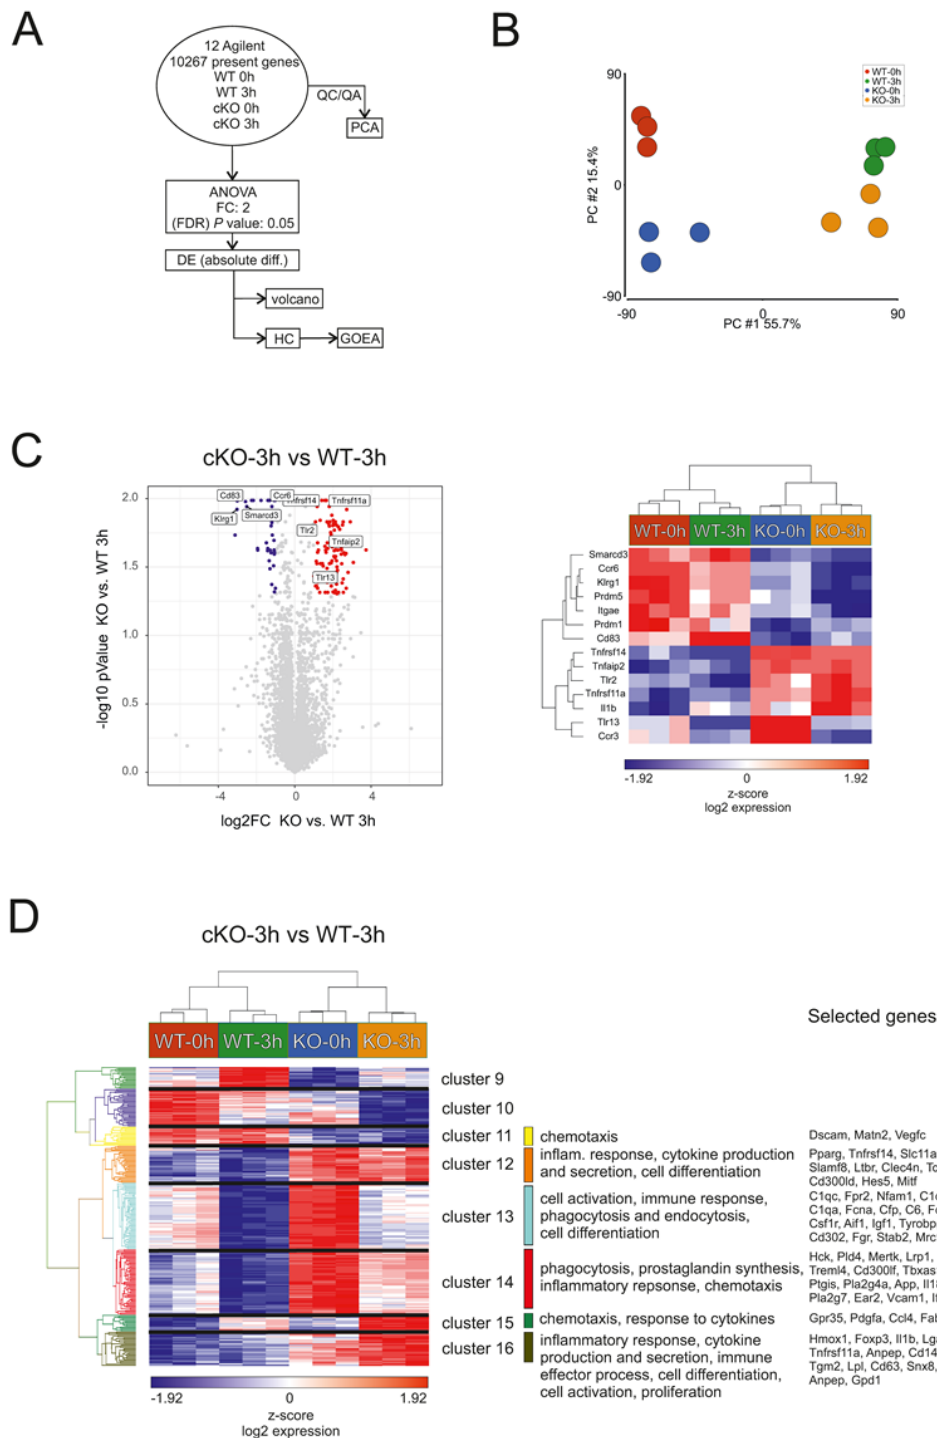

**Supplementary Figure 3. CD83 deletion on Tregs leads to highly differentiated gene expression**

(A) Schematic description of the Microarray analysis workflow of cKO Tregs and DERE (WT) Tregs. (B) Principal component analysis (PCA) using all 10,267 present transcripts was performed in Partek Genomics Suite (PGS) using default settings, and principle component 1 (PC1) and PC2 are plotted in a two-dimensional graph. (C) Volcano plot of all present genes comparing stimulated cKO T cells versus stimulated WT Tregs. Interesting differentially



expressed genes has been highlighted. Clustering of differentially expressed genes. **(D)** Hierarchical clustering of genes differentially expressed ( $p\text{-value} \leq 0.05$  and fold change  $\geq 2$ ) comparing stimulated cKO T cells versus stimulated WT Tregs.

**Supplementary table 1. Oligonucleotide primer**

| Name         |     | Sequence                  | Annealing temperature |
|--------------|-----|---------------------------|-----------------------|
| CD83         | for | CGCAGCTCTCCTATGCAGTG      | 61°C                  |
|              | rev | GTGTTTTGGATCGTCAGGGAATA   | 61°C                  |
| Foxp3        | for | CCCAGGAAAGACAGCAACCTT     | 61°C                  |
|              | rev | CCTTGCCTTTCTCATCCAGGA     | 61°C                  |
| GATA3        | for | CCAAGCGAAGGCTGTCGGCA      | 61°C                  |
|              | rev | TCCTCCAGCGCGTCATGCAC      | 61°C                  |
| HPRT         | for | GTTGGATACAGGCCAGACTTTGTTG | 61°C                  |
|              | rev | GATTCAACTTGCGCTCATCTTAGGC | 61°C                  |
| IFN $\gamma$ | for | GCTTTGCAGCTCTTCCTCAT      | 61°C                  |
|              | rev | GTCACCATCCTTTTGCCAGT      | 61°C                  |
| IL-1 $\beta$ | for | TGCCACCTTTTGACAGTGATG     | 61°C                  |
|              | rev | ATGTGCTGCTGCGAGATTTG      | 61°C                  |
| IL-6         | for | ACAAAGCCAGAGTCCTTCAGAG    | 61°C                  |
|              | rev | GAGCATTGGAAATTGGGGTAGG    | 61°C                  |
| IL-10        | for | CCAAGCCTTATCGGAAATGA      | 61°C                  |
|              | rev | TTTTCACAGGGGAGAAATCG      | 61°C                  |
| IL-17A       | for | TTTAACTCCCTTGGCGCAAAA     | 61°C                  |
|              | rev | CTTTCCTCCGCATTGACAC       | 61°C                  |
| Tbet         | for | AGCAAGGACGGCGAATGTT       | 61°C                  |
|              | rev | GGGTGGACATATAAGCGGTTC     | 61°C                  |
| TGF $\beta$  | for | TGGAGCAACATGTGGA ACTCTA   | 61°C                  |
|              | rev | AGACAGCCACTCAGGCGTATC     | 61°C                  |

**Supplementary table 2. NFAT Expression Analysis**

| Gene Name                   | Nfatc1   | Nfatc2    | Nfatc2ip | Nfatc3   |
|-----------------------------|----------|-----------|----------|----------|
| Fold-Change<br>(cKO vs. WT) | -1.11833 | -1.18238  | -1.05015 | -1.25807 |
| p-value<br>(cKO vs. WT)     | 0.508406 | 0.0152669 | 0.736368 | 0.255363 |

Microarray analysis data. Differential expression analysis of Nfat genes by ANOVA showed significant downregulation of Nfatc2 in cKO Treg cells. The other Nfat members were not affected significantly.
